# Supplementary material for: Synthesis of a class of 5-((5-(pyrrol-2-yl-methylene)-pyrrol-2-yl)methylene)furan-2-ones and the formation of a furanone dipyrrin imino ether
Source: Royal Society of Chemistry journal article supplement (doi:10.1039/c1nj20415g), 2011-01-01
Supplement: c1nj20415g.pdf [file c1nj20415g.pdf]

*Supporting Information for*

**Synthesis of a class of 5-((5-(pyrrol-2-yl-methylene)-pyrrol-2-yl)methylene)furan-2-ones and the formation of a furanone dipyrin imino ether**

Ji-Young Shin and David Dolphin\*

*Department of Chemistry, University of British Columbia, 2036 Main Mall, Vancouver, BC V6T 1Z1, Canada,  
Tel: 1-604-822-3200, Fax: 1-604-822-9678*

*Content*

***NMR spectra of the compounds 1~3 ----- S2***

***Crystallographic data ----- S16***

<NMR Spectra>

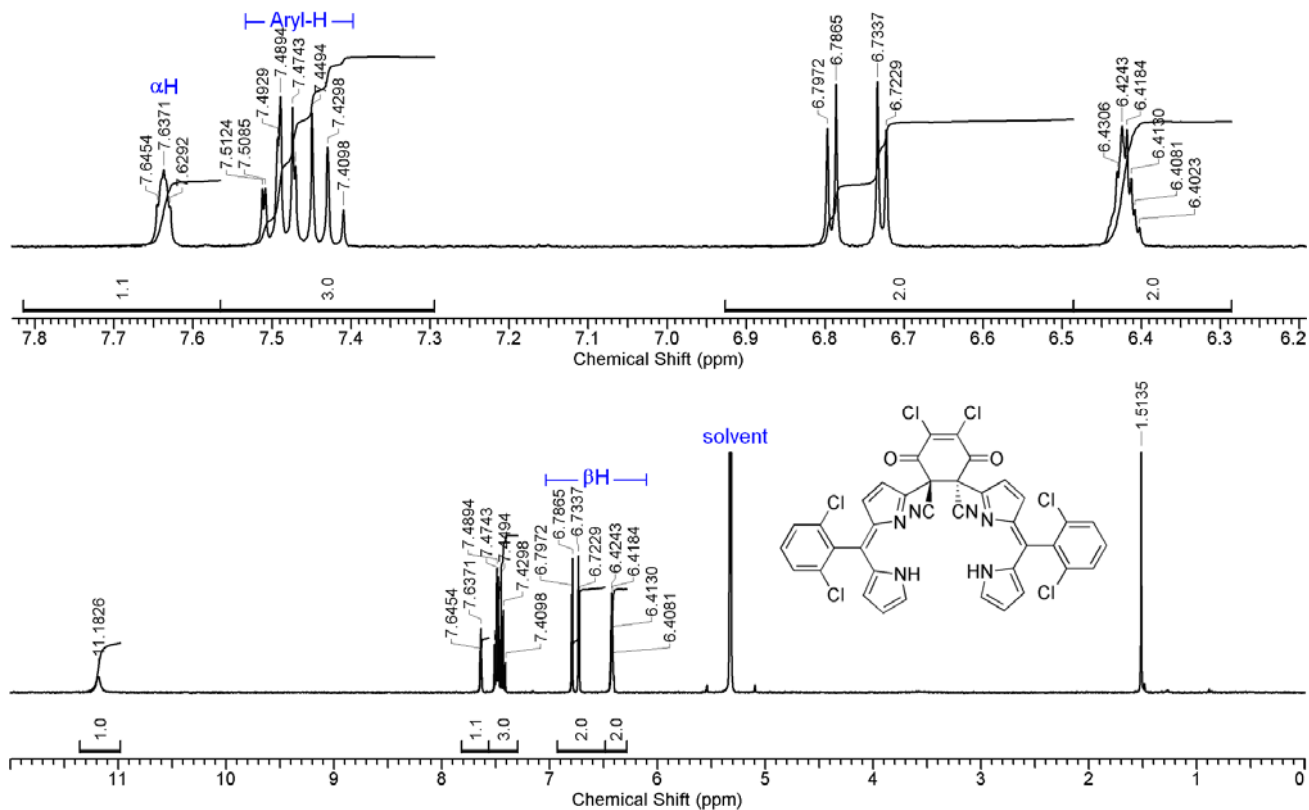

Fig. S1 <sup>1</sup>H NMR (400 MHz) spectrum of 1a.

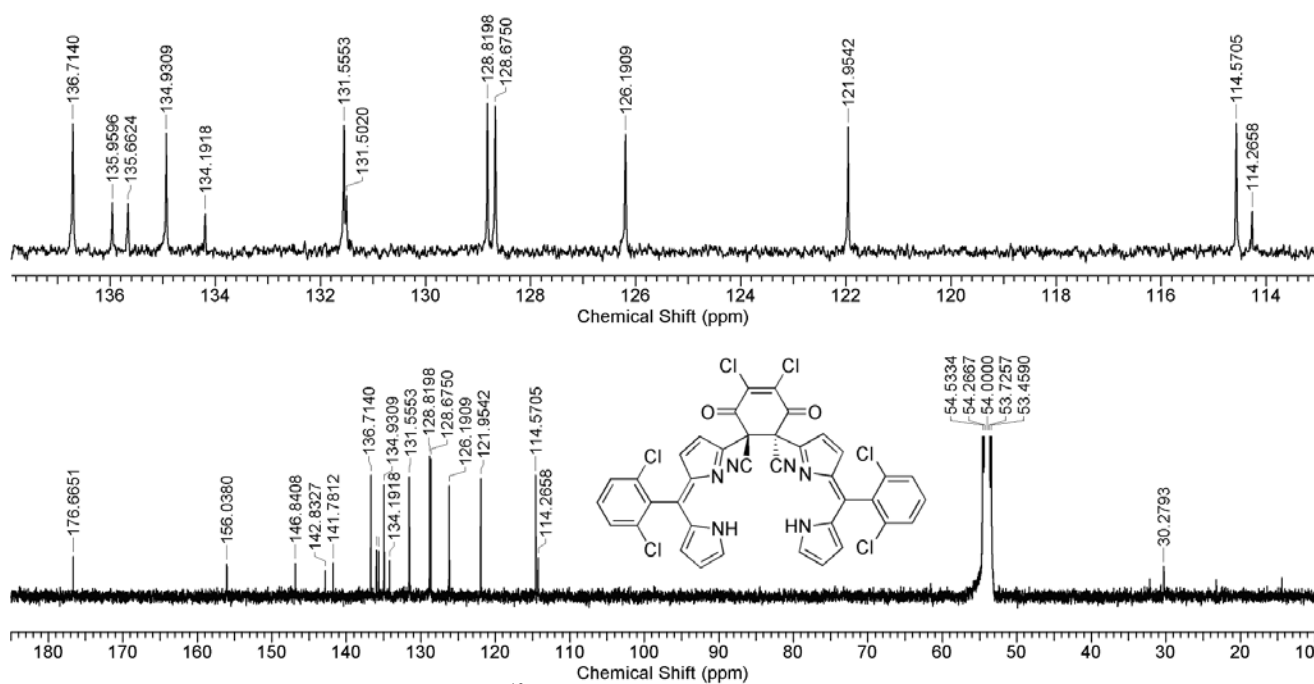

Fig. S2 <sup>13</sup>C NMR (100 MHz) spectrum of 1a.

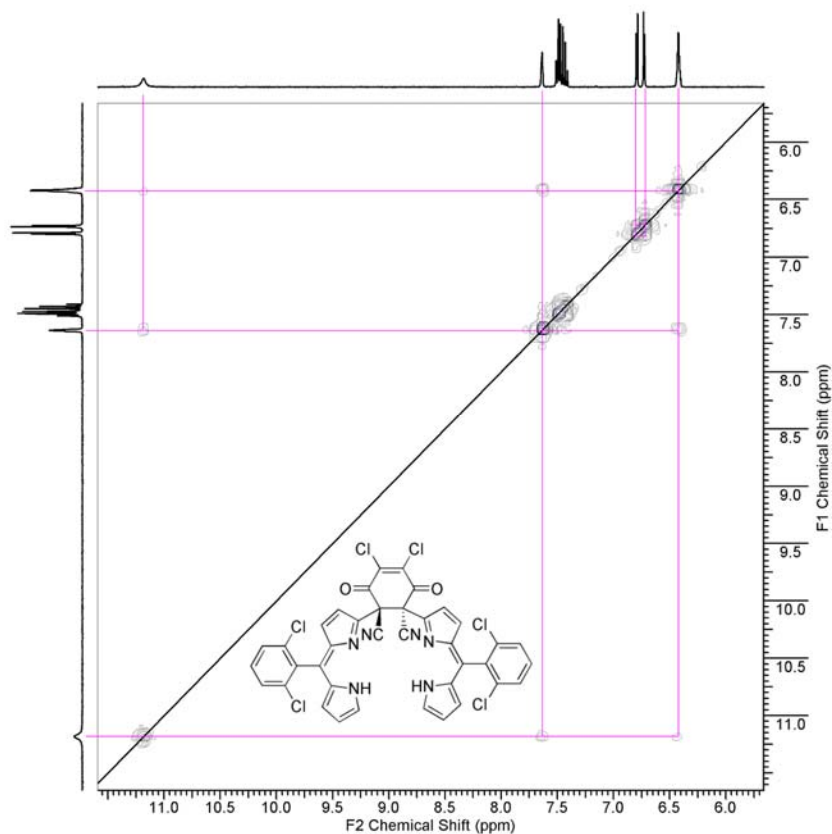

Fig. S3 HHCOSY NMR (F1 and F2: 400 MHz) spectrum of **1a**.

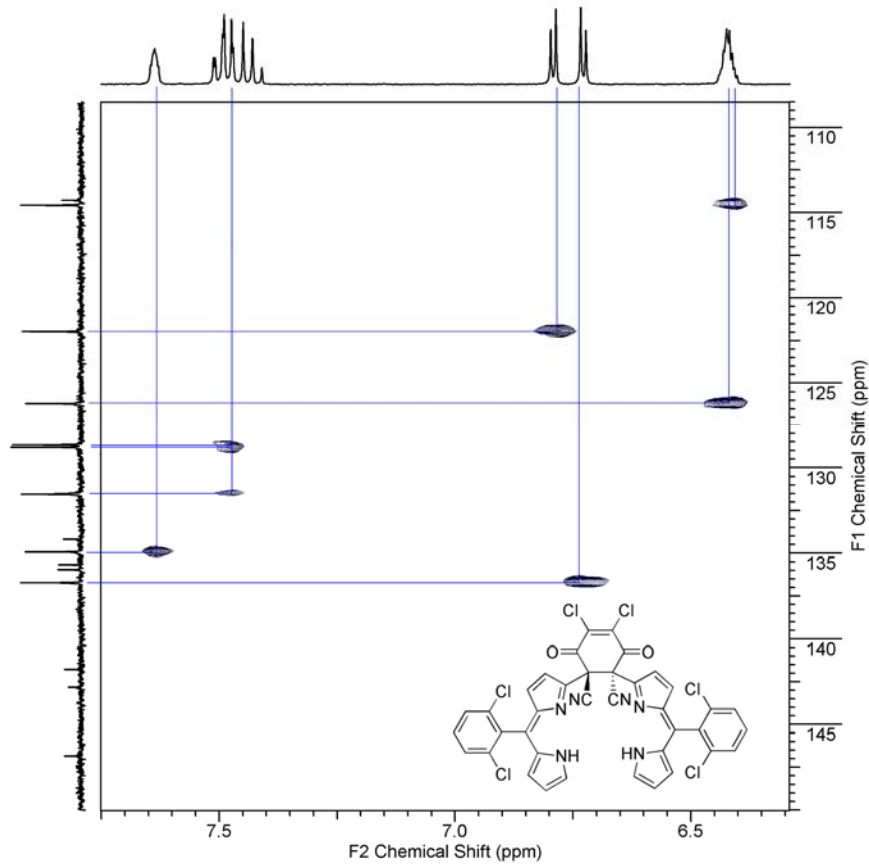

Fig. S4 HMQC NMR (F1: 100 MHz, F2: 400 MHz) spectra of **1a**.

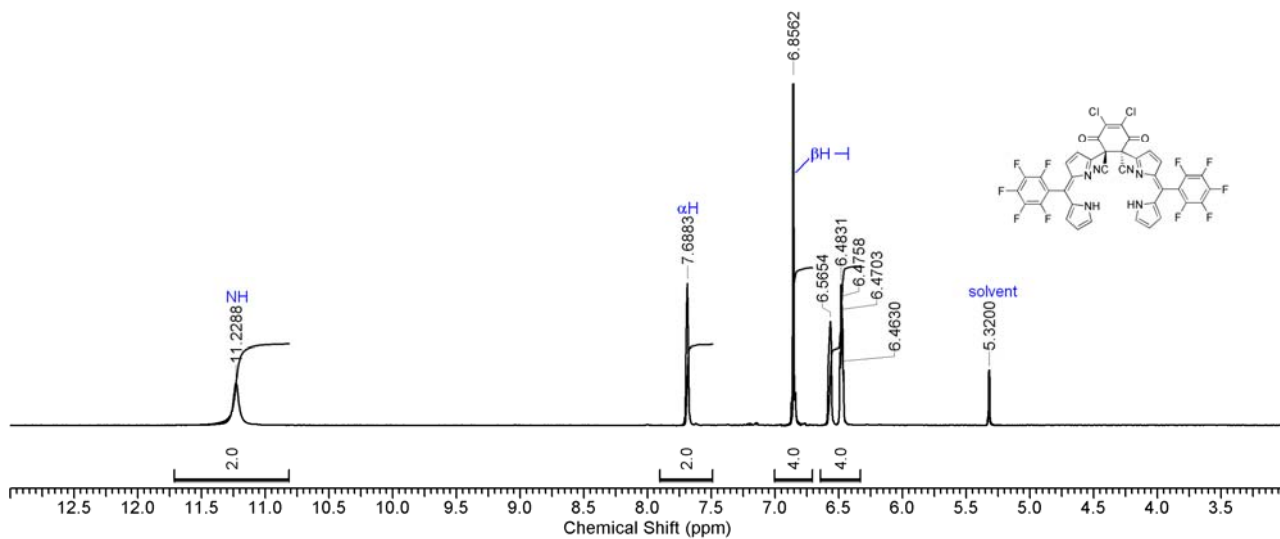

Fig. S5  $^1\text{H}$  NMR (300 MHz) spectrum of **1b**.

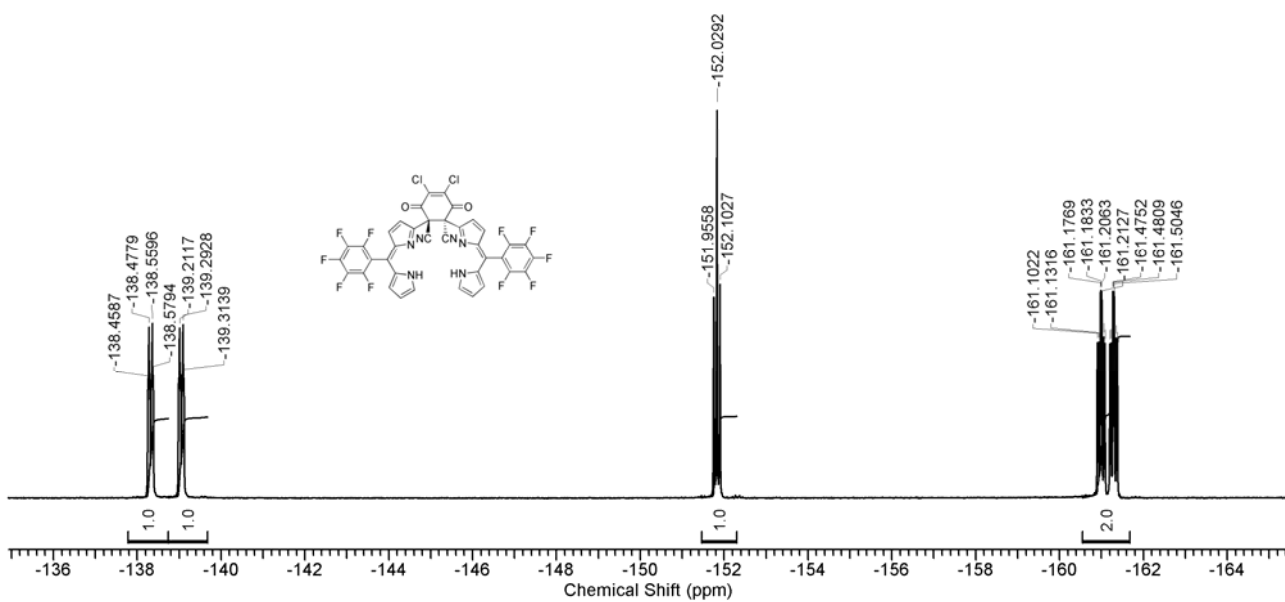

Fig. S6  $^{19}\text{F}$  NMR (282.4 MHz) spectrum of **1b**.

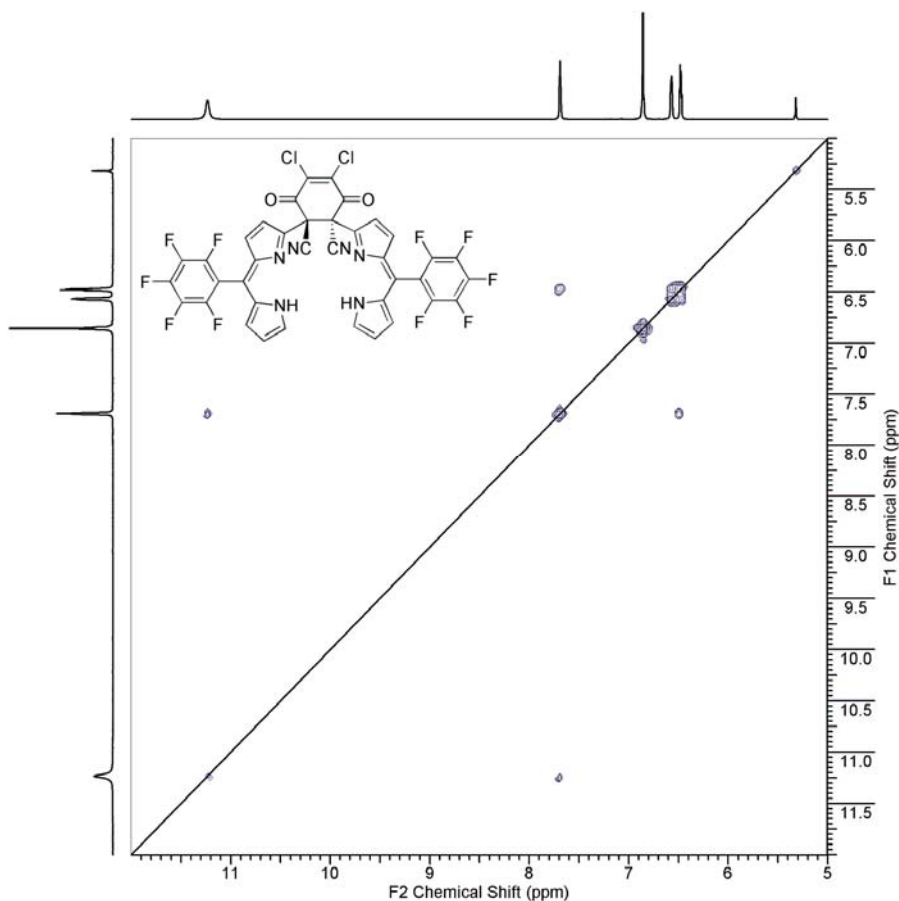

Fig. S7 HHCOSY NMR (F1 and F2: 400 MHz) spectrum of **1b**.

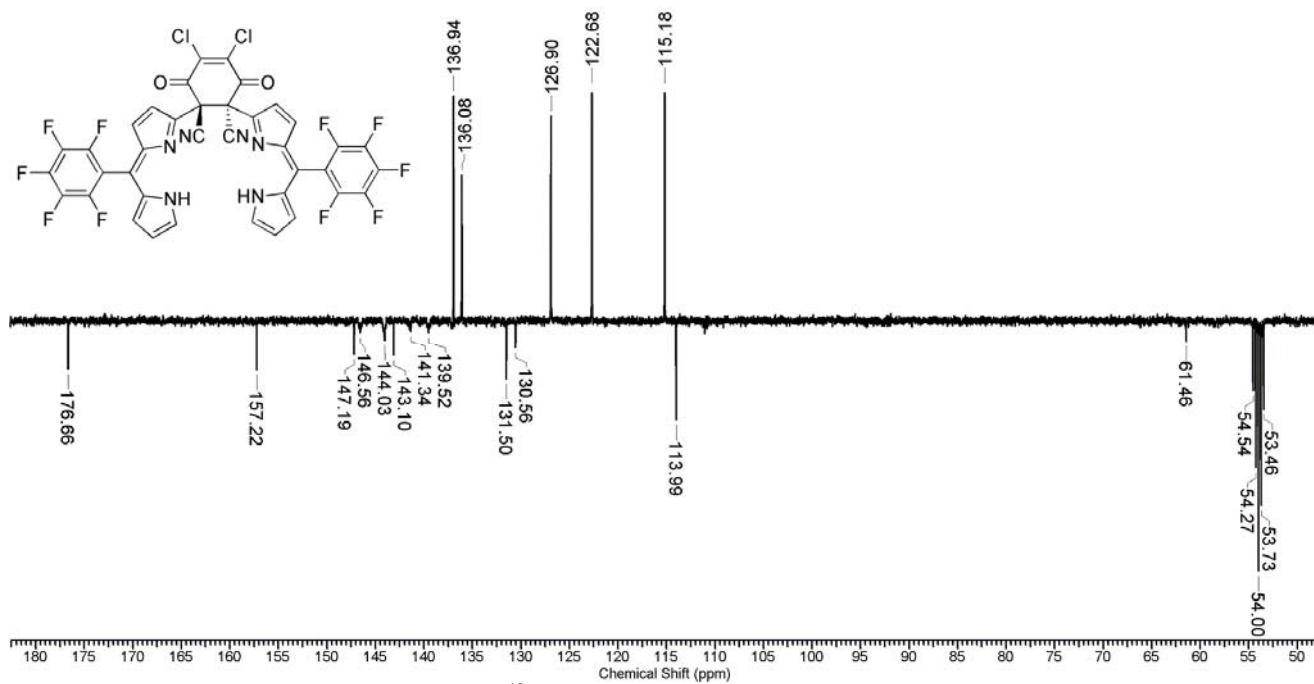

Fig. S8  $^{13}\text{C}$  NMR (100 MHz) spectrum of **1b**.



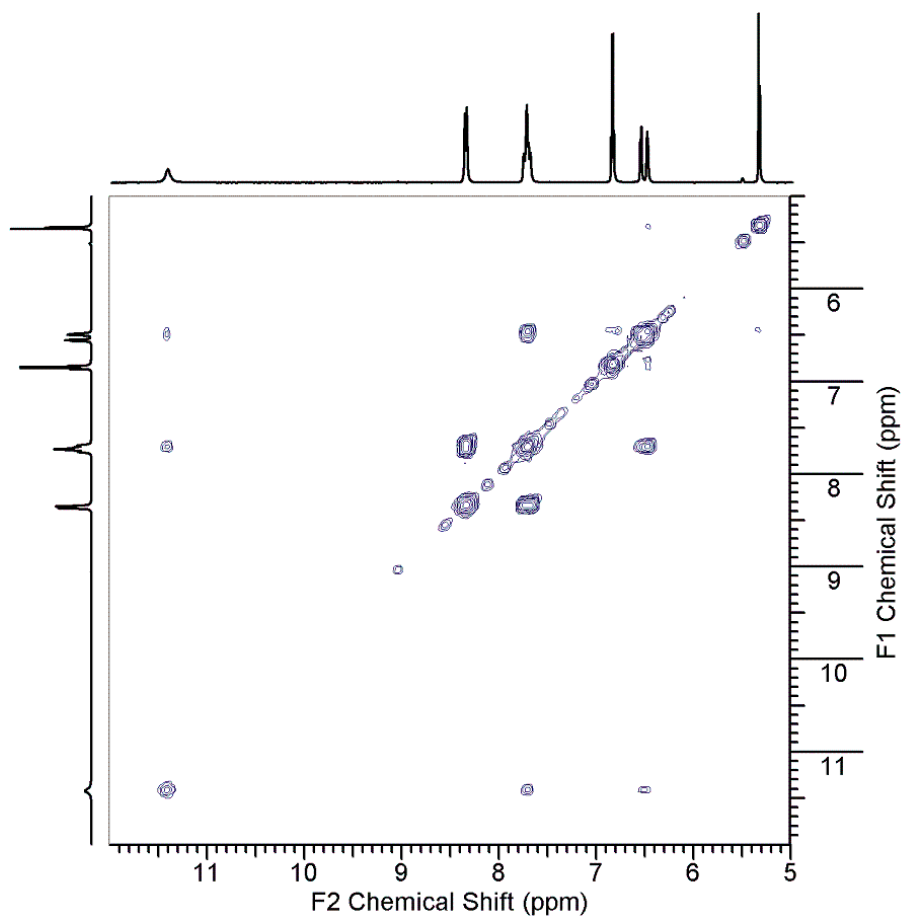

Fig. S11 HHCOSY NMR (F1 and F2: 400 MHz) spectrum of **1c**.

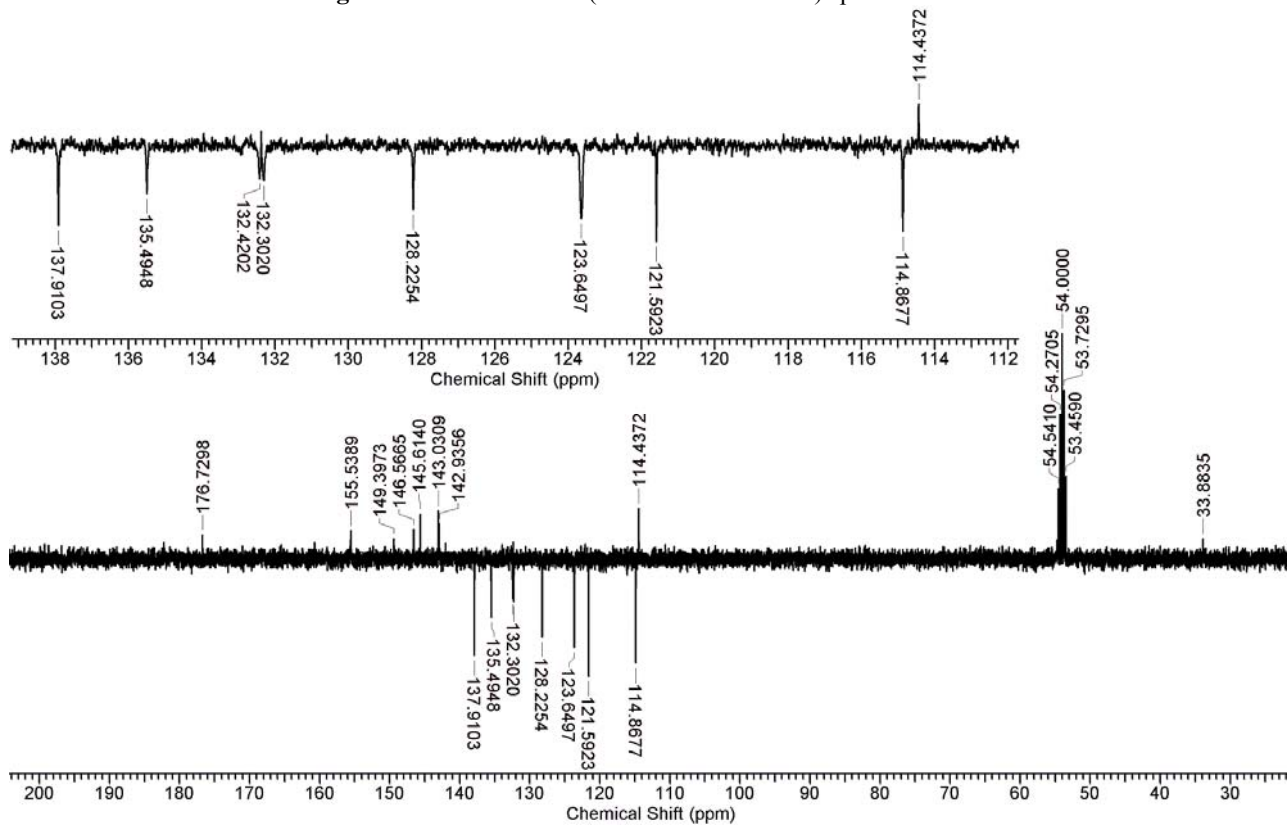

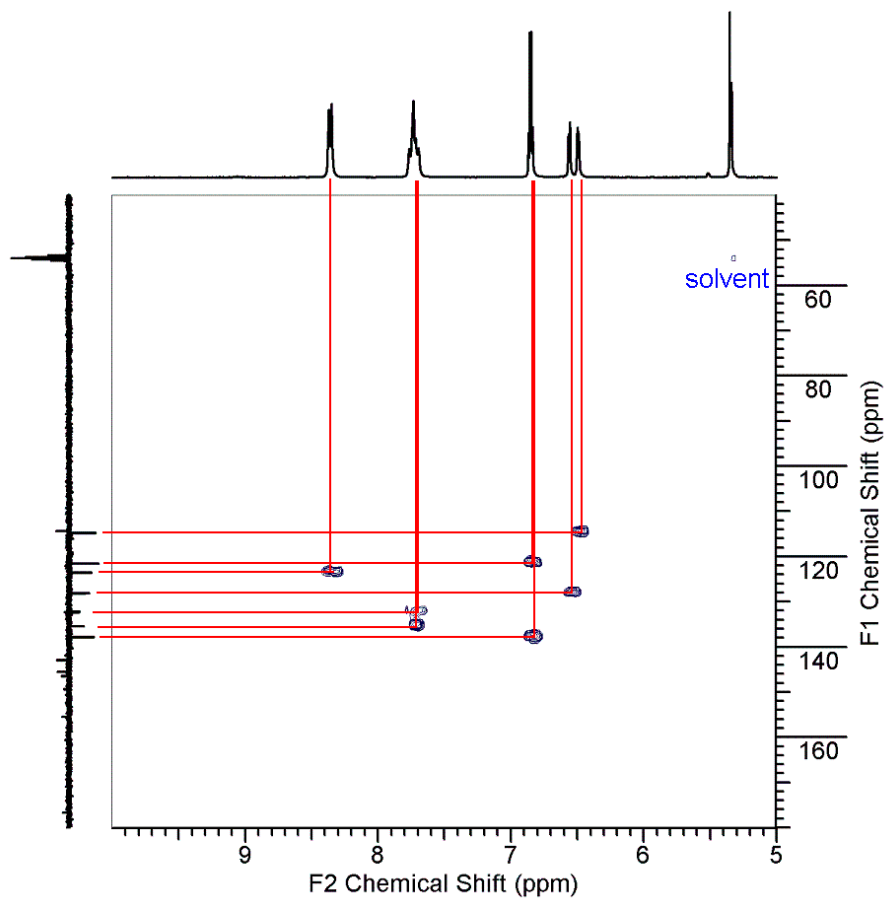

Fig. S13 HMQC NMR (F1: 100 MHz, F2: 400 MHz) spectrum of **1c**.

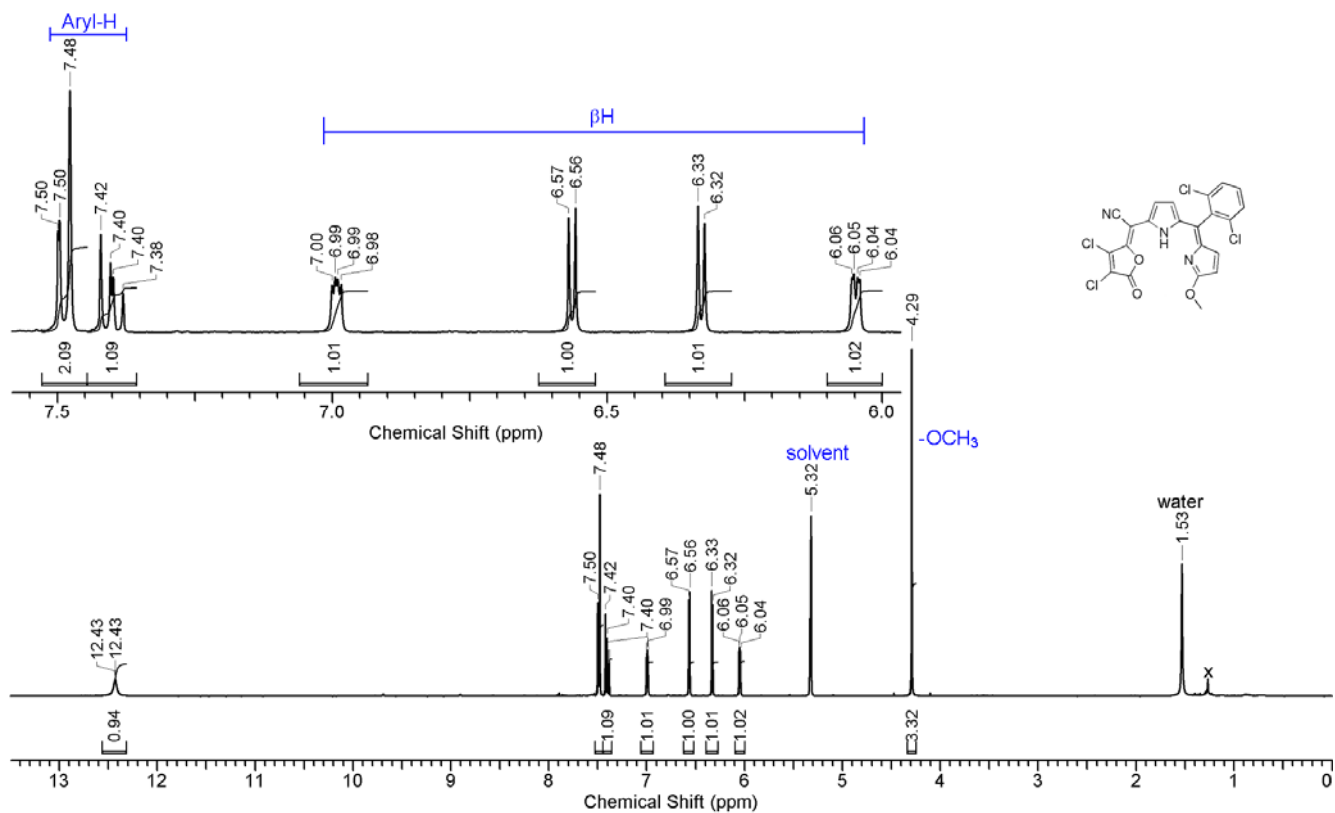

Fig. S14  $^1\text{H}$  NMR (400 MHz) spectrum of **2a-1**.



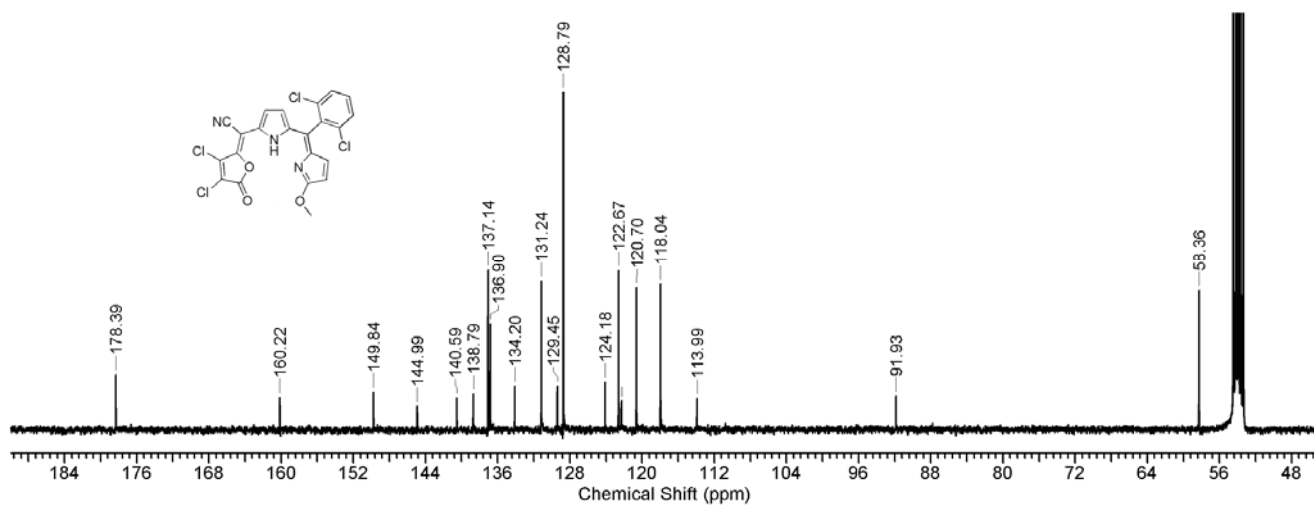

Fig. S15  $^{13}\text{C}$  NMR (100 MHz) spectrum of 2a-1.

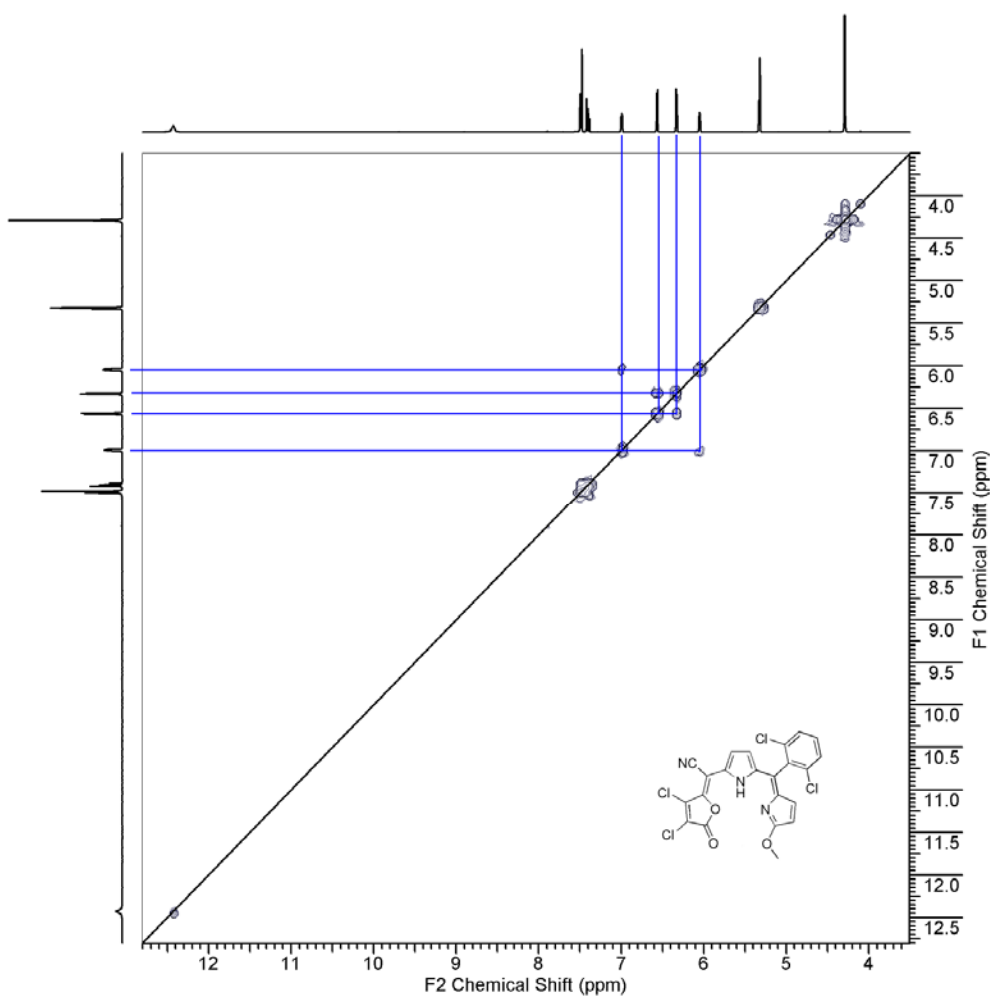

Fig. S16 HHCOSY NMR (F1 and F2: 400 MHz) spectrum of 2a-1.

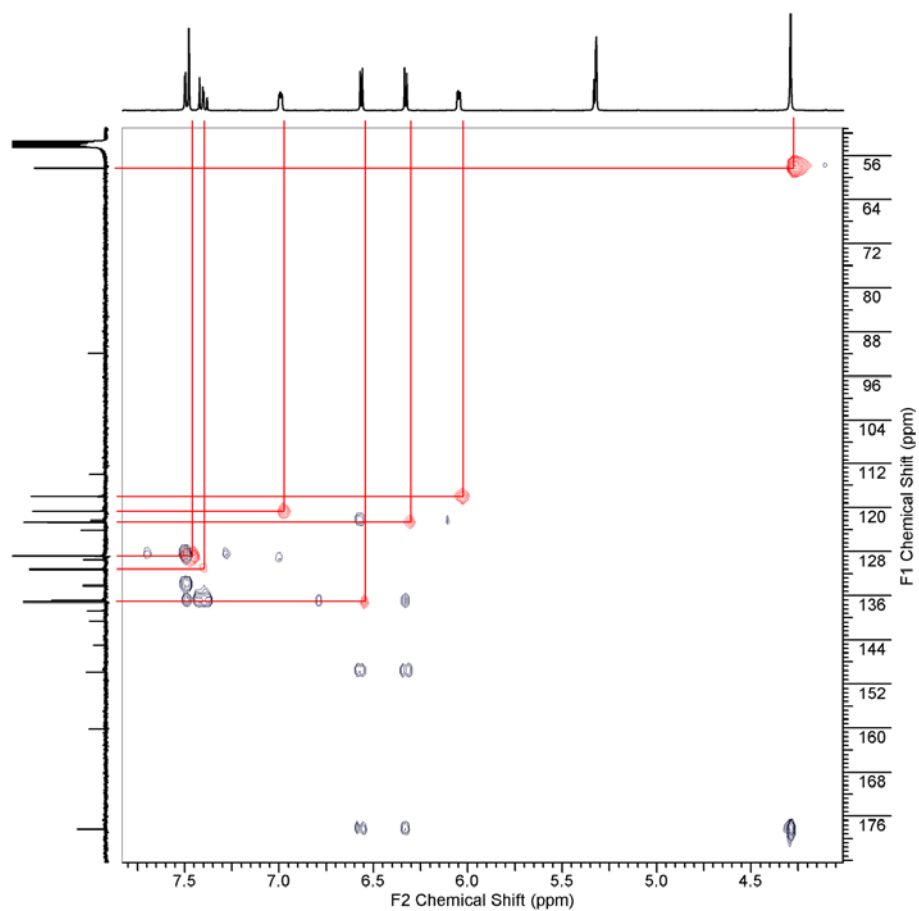

Fig. S17 HMQC(red) and HMBC(blue) NMR (F1: 100 MHz, F2: 400 MHz) spectra of 2a-1.

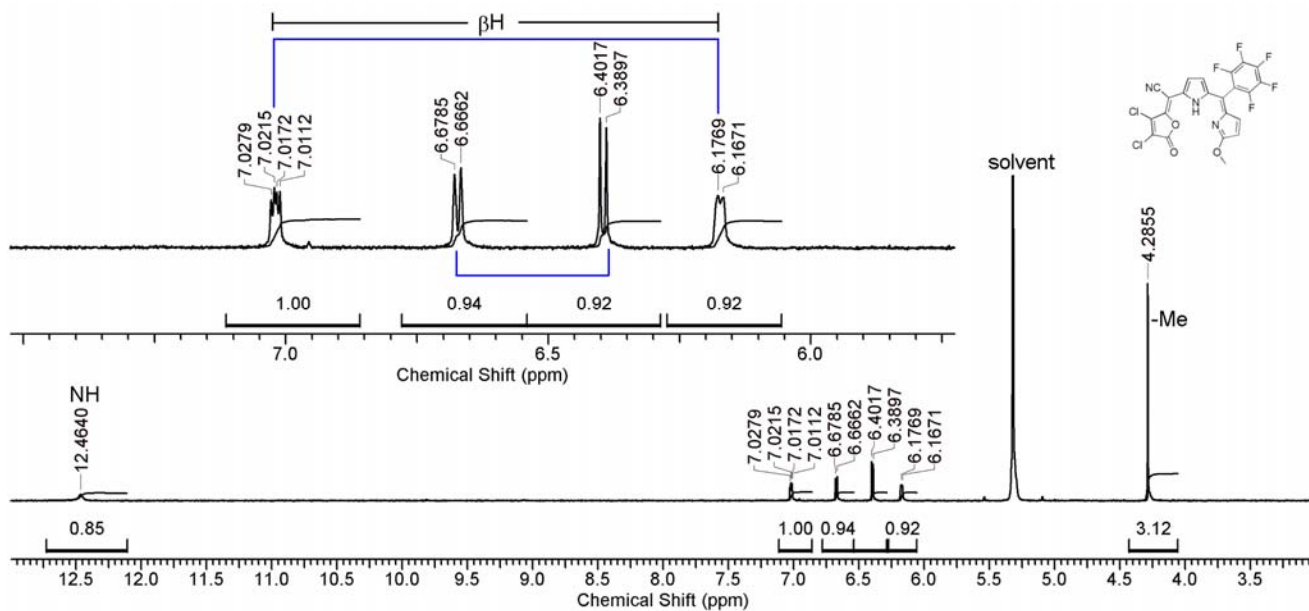

Fig. S18 <sup>1</sup>H NMR (400 MHz) spectrum of 2b-1.

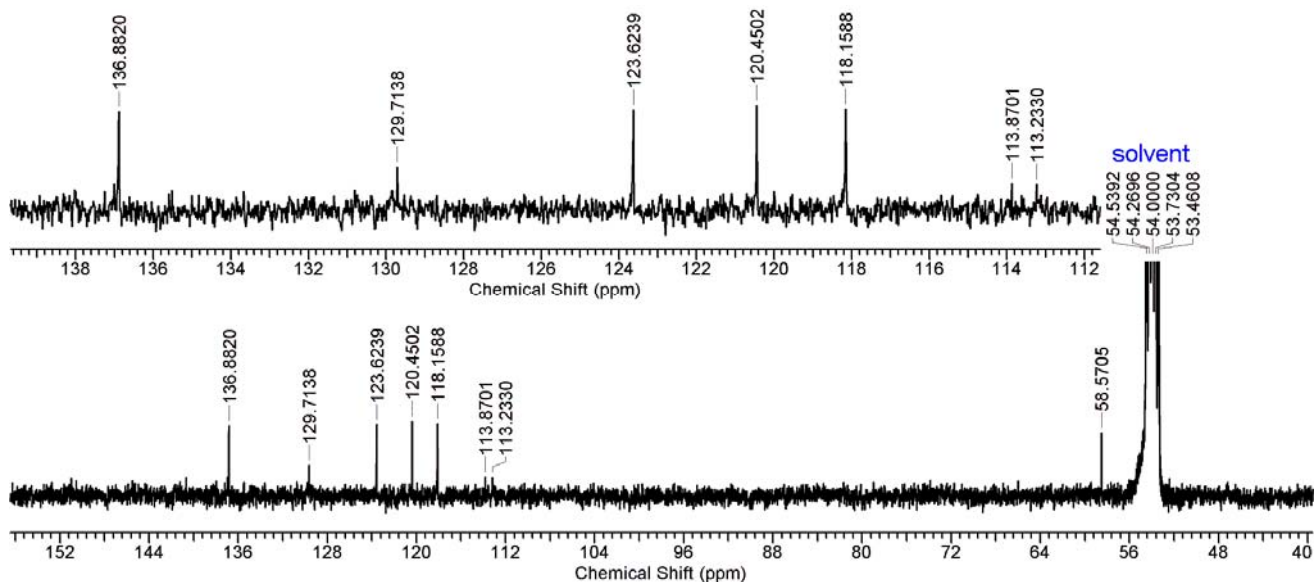

Fig. S19  $^{13}\text{C}$  NMR (100 MHz) spectrum of 2b-1.

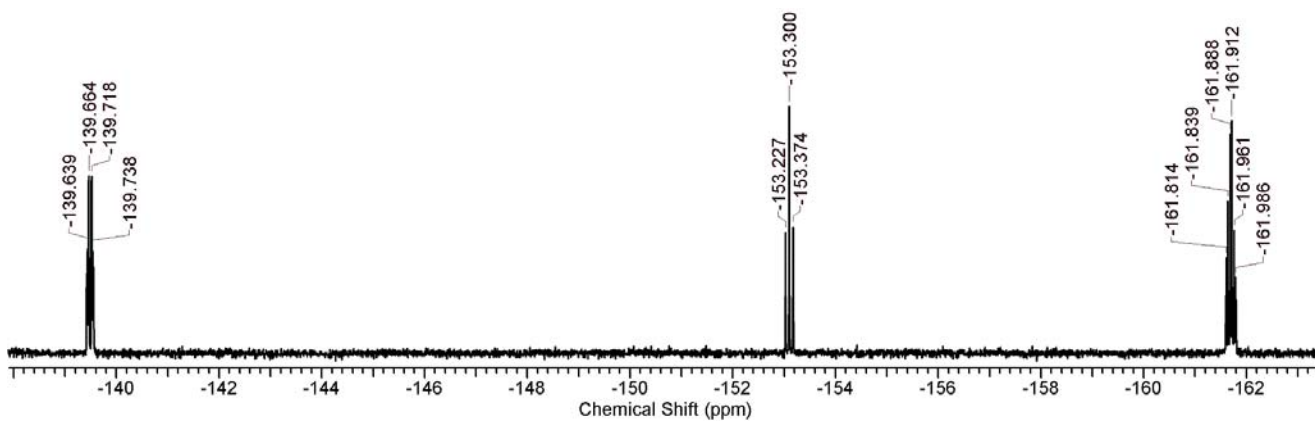

Fig. S20  $^{19}\text{F}$  NMR (282.4 MHz) spectrum of 2b-1.

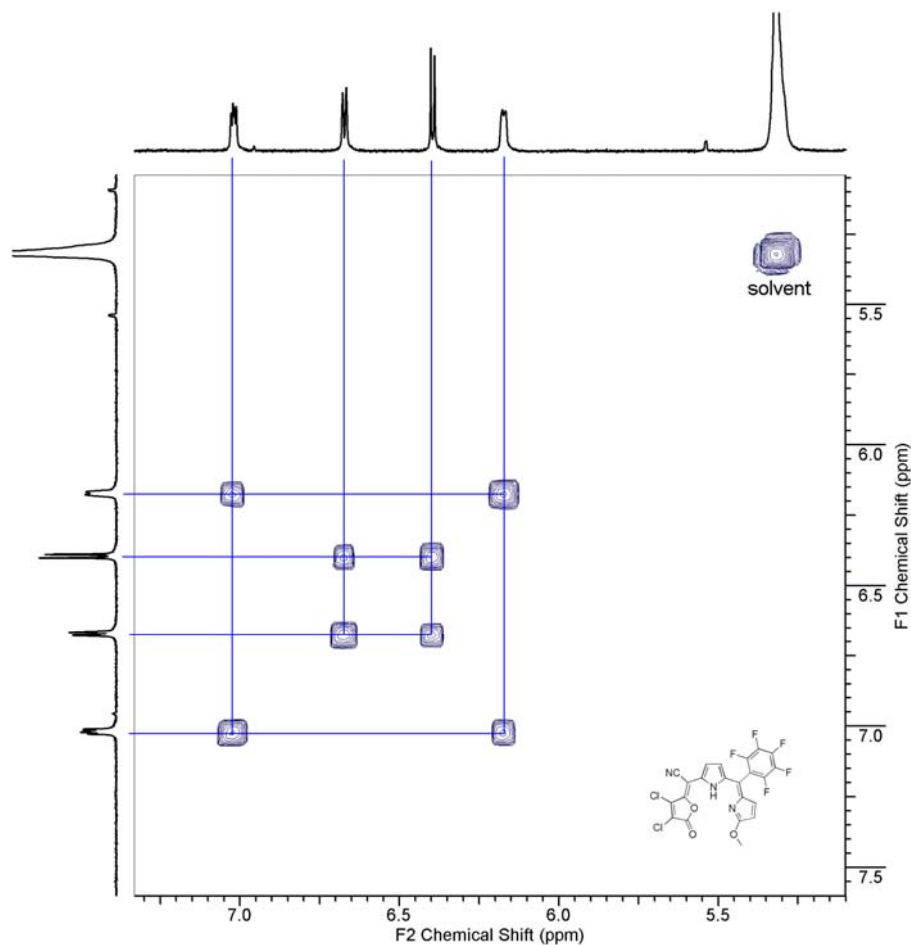

Fig. S21 HHCOSY NMR (F1 and F2: 400 MHz) spectrum of **2b-1**.

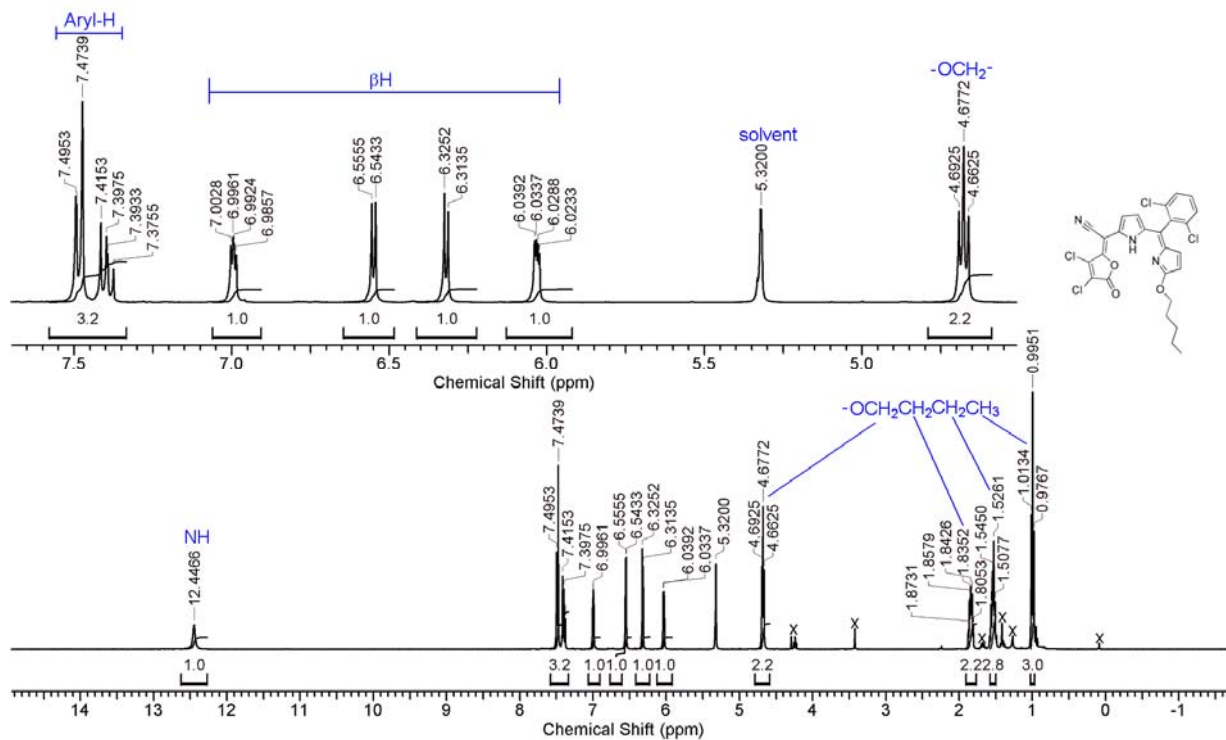

Fig. S22 <sup>1</sup>H NMR (400 MHz) spectrum of **2a-2**.



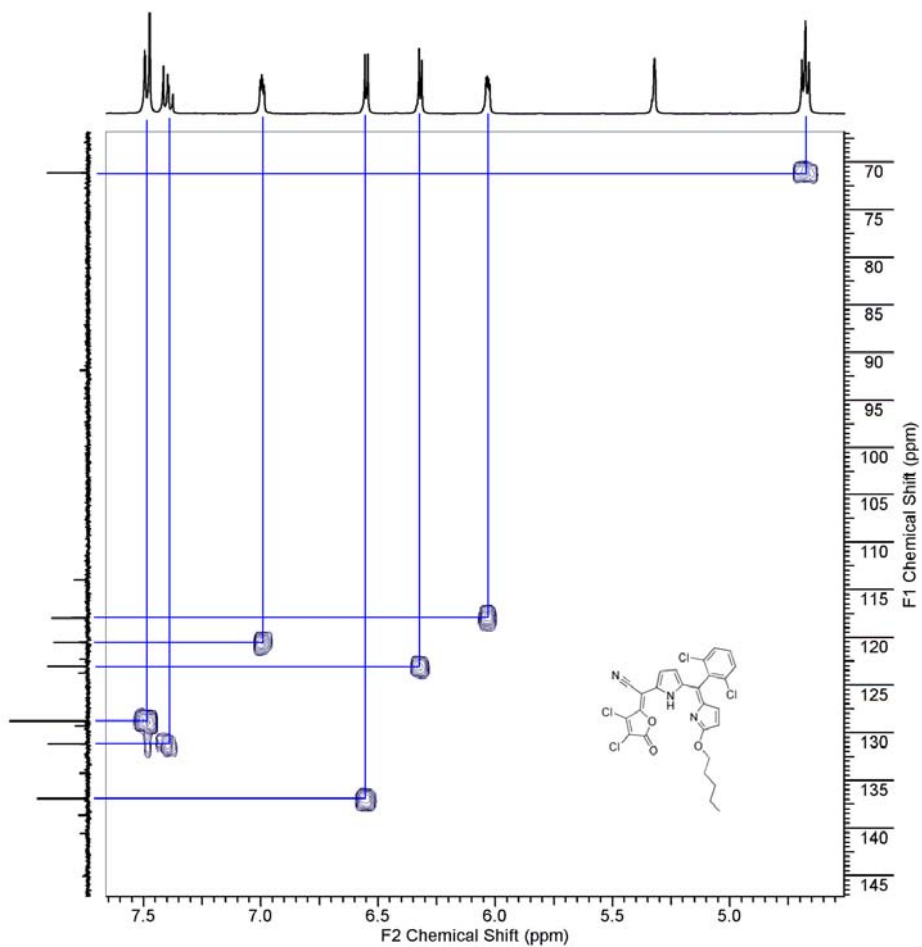

Fig. S25 HMQC NMR (F1: 100 MHz, F2: 400 MHz) spectrum of 2a-2.

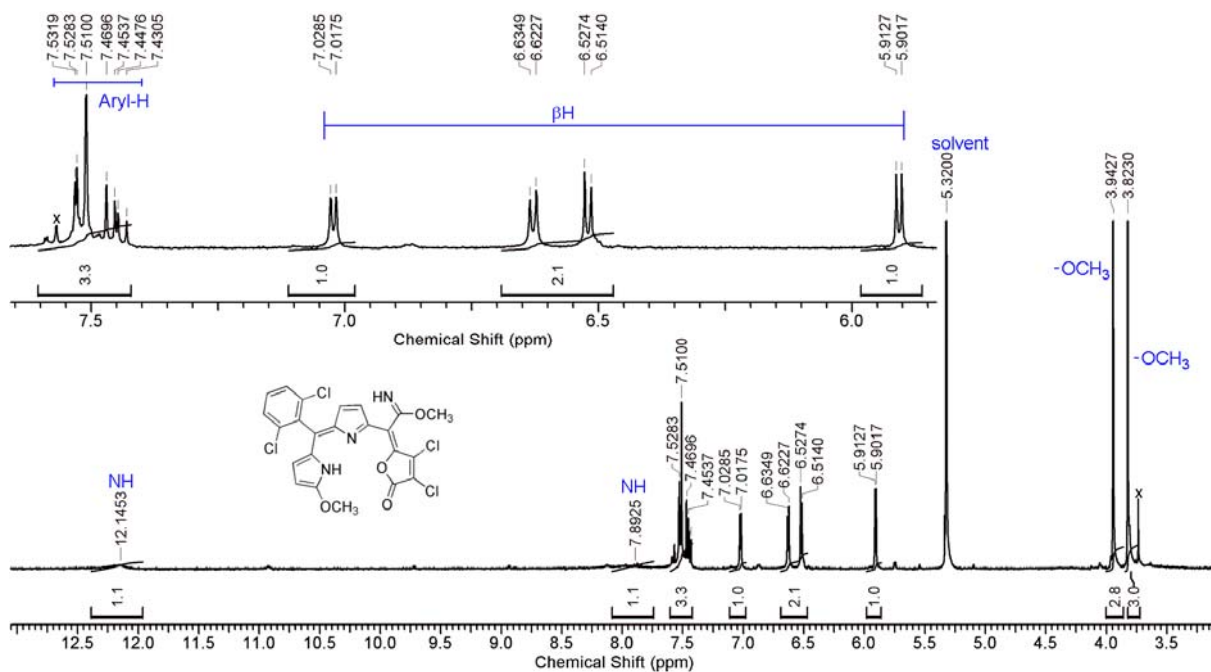

Fig. S26 <sup>1</sup>H NMR (400 MHz) spectrum of 3.

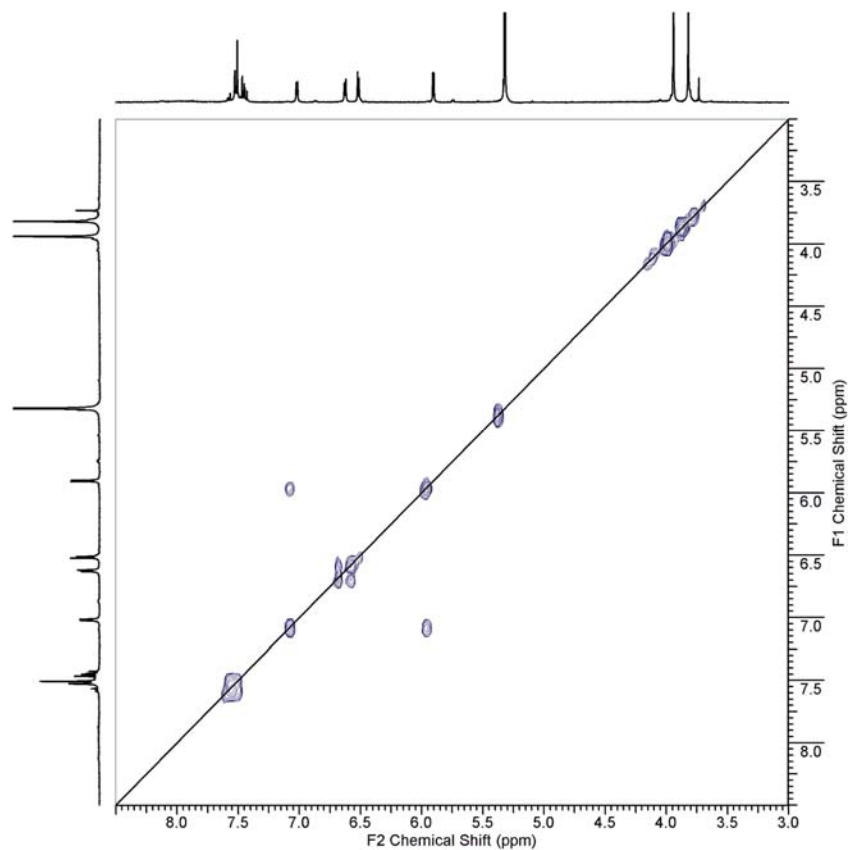

Fig. S27 HHCOSY NMR (F1 and F2: 400 MHz) spectrum of **3**.

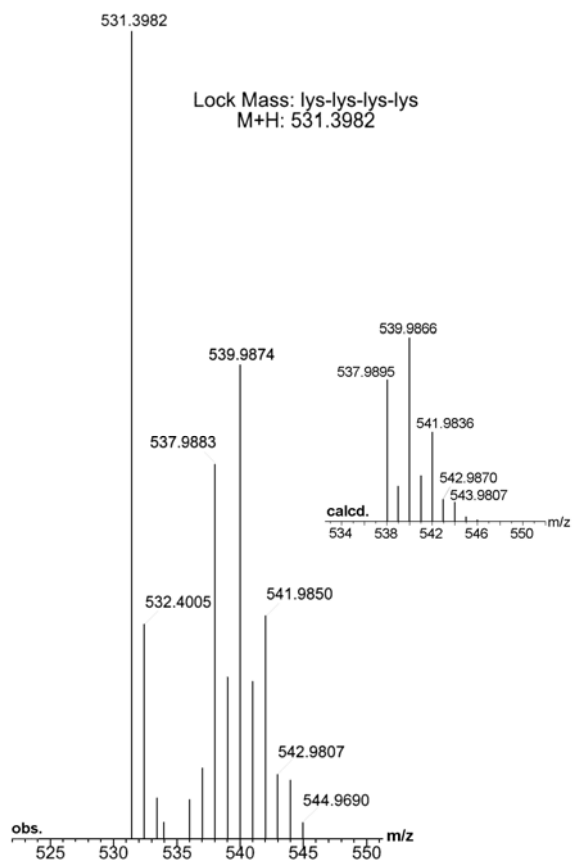

Fig. S28 HR ESI(+) TOF mass spectrum of **3**: calculated and observed spectra.

## <Crystallographic data>

### Crystallographic data of 2b-1

A crystalline red plate of  $C_{22}H_8N_3O_3F_5Cl_2$  having approximate dimensions of  $0.12 \times 0.25 \times 0.40$  mm was mounted on a glass fiber. All measurements were made on a Bruker X8 APEX II diffractometer with graphite monochromated Mo-K $\alpha$  radiation. The data were collected at a temperature of  $-100.0 \pm 0.1^\circ\text{C}$  to a maximum  $2\theta$  value of  $56.0^\circ$ . Data were collected in a series of  $\phi$  and  $\omega$  scans in  $0.50^\circ$  oscillations with 10.0 second exposures. The crystal-to-detector distance was 36.00 mm.

Of the 20418 reflections that were collected, 4938 were unique ( $R_{\text{int}} = 0.024$ ); equivalent reflections were merged. Data were collected and integrated using the Bruker SAINT<sup>S1</sup> software package. The linear absorption coefficient,  $\mu$ , for Mo-K $\alpha$  radiation is  $3.91 \text{ cm}^{-1}$ . Data were corrected for absorption effects using the multi-scan technique (SADABS<sup>S2</sup>), with minimum and maximum transmission coefficients of 0.890 and 0.954, respectively. The data were corrected for Lorentz and polarization effects.

The structure was solved by direct methods<sup>S3</sup>. All non-hydrogen atoms were refined anisotropically. All C-H hydrogen atoms were placed in calculated positions but were not refined. The N-H hydrogen atom was located in a difference map and refined isotropically. The final cycle of full-matrix least-squares refinement<sup>S4</sup> on  $F^2$  was based on 4938 reflections and 321 variable parameters and converged (largest parameter shift was 0.00 times its esd) with unweighted and weighted agreement factors ( $R1 = 0.046$  and  $wR2 = 0.102$ ).

The standard deviation of an observation of unit weight<sup>S5</sup> was 0.99. The weighting scheme was based on counting statistics. The maximum and minimum peaks on the final difference Fourier map corresponded to 0.41 and  $-0.32 \text{ e}^-/\text{\AA}^3$ , respectively.

Neutral atom scattering factors were taken from Cromer and Waber<sup>S6</sup>. Anomalous dispersion effects were included in  $F_{\text{calc}}$ <sup>S7</sup>; the values for  $\Delta f'$  and  $\Delta f''$  were those of Creagh and McAuley<sup>S8</sup>. The values for the mass attenuation coefficients are those of Creagh and Hubbell<sup>S9</sup>. All refinements were performed using the SHELXTL<sup>S10</sup> crystallographic software package from Bruker-AXS.

**Table S1.** Parameters for the hydrogen-bonds of **2b-1**.

| Donor --- H...Acceptor | D - H (Å) | H...A (Å) | D...A (Å)  | D - H...A (°) |
|------------------------|-----------|-----------|------------|---------------|
| N(1) --H(1n) ..N(2)    | 0.84(3)   | 2.18(2)   | 2.7618(19) | 127(2)        |
| N(1) --H(1n) ..O(2)    | 0.84(3)   | 2.39(2)   | 2.8605(18) | 116.3(18)     |

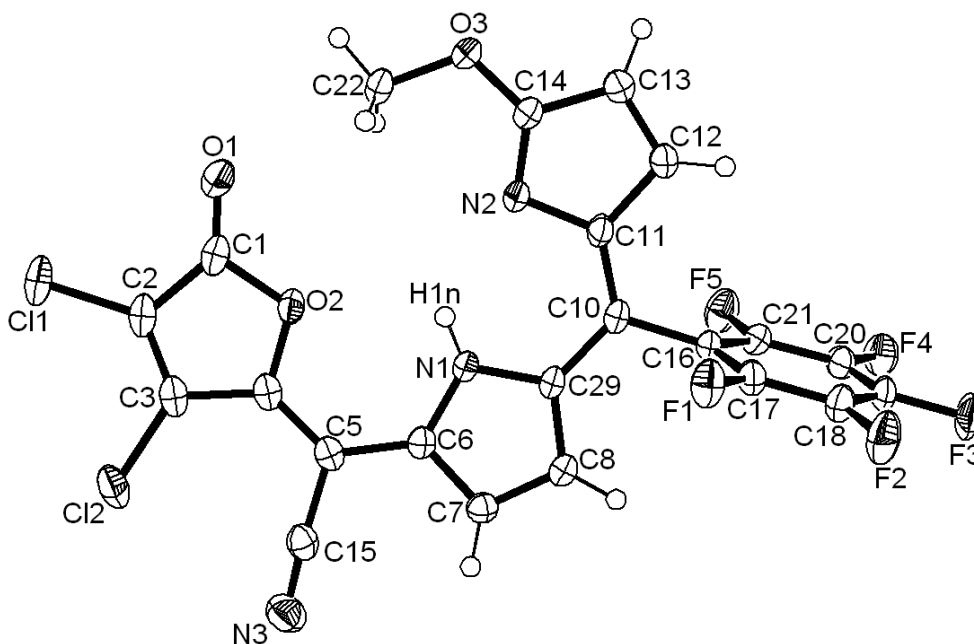



### Crystallographic data of 2a-2

A crystalline black prism of  $C_{25}H_{17}N_3O_3Cl_4$  having approximate dimensions of  $0.40 \times 0.45 \times 0.55$  mm was mounted on a glass fiber. All measurements were made on a Bruker X8 APEX II diffractometer with graphite monochromated Mo-K $\alpha$  radiation. The data were collected at a temperature of  $-100.0 \pm 0.1^\circ\text{C}$  to a maximum  $2\theta$  value of  $56.2^\circ$ . Data were collected in a series of  $\phi$  and  $\omega$  scans in  $0.50^\circ$  oscillations with 10.0 second exposures. The crystal-to-detector distance was 36.00 mm.

Of the 38352 reflections that were collected, 5806 were unique ( $R_{\text{int}} = 0.028$ ); equivalent reflections were merged. Data were collected and integrated using the Bruker SAINT<sup>S1</sup> software package. The linear absorption coefficient,  $\mu$ , for Mo-K $\alpha$  radiation is  $5.16 \text{ cm}^{-1}$ . Data were corrected for absorption effects using the multi-scan technique (SADABS<sup>S2</sup>), with minimum and maximum transmission coefficients of 0.674 and 0.814, respectively. The data were corrected for Lorentz and polarization effects.

The structure was solved by direct methods<sup>S3</sup>. All non-hydrogen atoms were refined anisotropically. All C-H hydrogen atoms were placed in calculated positions but were not refined. The N-H hydrogen atom was located in a difference map and refined isotropically. The final cycle of full-matrix least-squares refinement<sup>S4</sup> on  $F^2$  was based on 5806 reflections and 321 variable parameters and converged (largest parameter shift was 0.00 times its esd) with unweighted and weighted agreement factors ( $R1 = 0.057$  and  $wR2 = 0.118$ ).

The standard deviation of an observation of unit weight<sup>S5</sup> was 1.08. The weighting scheme was based on counting statistics. The maximum and minimum peaks on the final difference Fourier map corresponded to 0.51 and  $-0.38 \text{ e}^-/\text{\AA}^3$ , respectively.

Neutral atom scattering factors were taken from Cromer and Waber<sup>S6</sup>. Anomalous dispersion effects were included in  $F_{\text{calc}}$ <sup>S7</sup>; the values for  $\Delta f'$  and  $\Delta f''$  were those of Creagh and McAuley<sup>S8</sup>. The values for the mass attenuation coefficients are those of Creagh and Hubbell<sup>S9</sup>. All refinements were performed using the SHELXTL<sup>S10</sup> crystallographic software package from Bruker-AXS.

**Table S2.** Parameters for the hydrogen-bonds of **2a-2**.

| Donor --- H...Acceptor | D - H (Å) | H...A (Å) | D...A (Å) | D - H...A (°) |
|------------------------|-----------|-----------|-----------|---------------|
| N(1) --H(1n) ..N(2)    | 0.88(2)   | 2.08(2)   | 2.730(2)  | 130(2)        |
| C(7) --H(7c) ..O(2)    | 0.95      | 2.49      | 2.889(3)  | 111           |

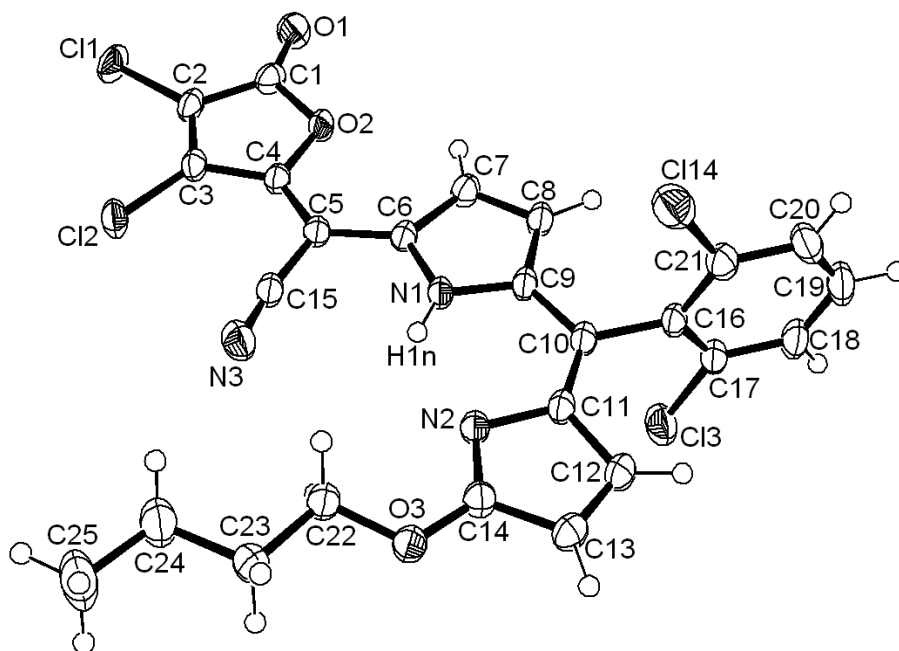

**Fig. S30** ORTEP structure of **2a-2**. Thermal ellipsoids are scaled to the 50% probability level.

**Table S3.** Crystallographic data of 2a-2 and 2b-1.

|                                        | <b>2a-2</b>                                                                   | <b>2b-1</b>                                                                                 |
|----------------------------------------|-------------------------------------------------------------------------------|---------------------------------------------------------------------------------------------|
| Formula                                | C <sub>25</sub> H <sub>17</sub> Cl <sub>4</sub> N <sub>3</sub> O <sub>3</sub> | C <sub>22</sub> H <sub>8</sub> Cl <sub>2</sub> F <sub>5</sub> N <sub>3</sub> O <sub>3</sub> |
| Mw                                     | 549.22                                                                        | 528.21                                                                                      |
| Crystal System                         | triclinic                                                                     | triclinic                                                                                   |
| Space group                            | P-1                                                                           | P-1                                                                                         |
| a / Å                                  | 7.5524(4)                                                                     | 7.0689(13)                                                                                  |
| b / Å                                  | 12.9084(7)                                                                    | 9.6348(19)                                                                                  |
| c / Å                                  | 13.1120(7)                                                                    | 16.074(3)                                                                                   |
| α / deg                                | 102.326(2)                                                                    | 94.959(7)                                                                                   |
| β / deg                                | 94.333(2)                                                                     | 95.467(7)                                                                                   |
| γ / deg                                | 98.378(2)                                                                     | 106.429(7)                                                                                  |
| V / Å <sup>3</sup>                     | 1227.94(11)                                                                   | 1037.9(3)                                                                                   |
| Z                                      | 2                                                                             | 2                                                                                           |
| D <sub>c</sub> / g cm <sup>-3</sup>    | 1.485                                                                         | 1.690                                                                                       |
| μ(MoKα) cm <sup>-1</sup>               | 0.71073                                                                       | 0.71073                                                                                     |
| Number of observed data (I > 0.00σ(I)) | 5806                                                                          | 4938                                                                                        |
| Reflection / Parameter Ratio           | 18.09                                                                         | 15.38                                                                                       |
| R1 <sup>a</sup> ; wR2 <sup>b</sup>     | 0.0574; 0.1179                                                                | 0.0456; 0.1019                                                                              |
| GOF                                    | 1.075                                                                         | 0.990                                                                                       |
| Number of observed data (I > 2σ(I))    | 4685                                                                          | 4046                                                                                        |
| (R1; wR2) <sup>c</sup>                 | 0.0409; 0.1008                                                                | 0.0347; 0.0926                                                                              |

<sup>a</sup> R1 =  $\sum \omega |F_o| - |F_c| / \sum \omega |F_o|$ , <sup>b</sup> wR2 =  $\sqrt{\sum \{\omega(F_o^2 - F_c^2)^2\} / \sum \omega(F_o^2)^2}$ , <sup>c</sup> refined on F, I > 2σ(I)

## Reference

- S1. **SAINT**. Version 7.03A. Bruker AXS Inc., Madison, Wisconsin, USA. (1997-2003).
- S2. **SADABS**. Bruker Nonius area detector scaling and absorption correction – V2.10, Bruker AXS Inc., Madison, Wisconsin, USA. (2003).
- S3. **SIR97**. A. Altomare, M. C. Burla, M. Camalli, G. L. Cascarano, C. Giacovazzo, A. Guagliardi, A. G. G. Moliterni, G. Polidori and R. Spagna, *J. Appl. Cryst.*, 1999, **32**, 115-119.
- S4. Least Squares function minimized:  $\sum w(F_o^2 - F_c^2)^2$
- S5. Standard deviation of an observation of unit weight:  $[\sum w(F_o^2 - F_c^2)^2 / (N_o - N_v)]^{1/2}$   
 Where: N<sub>o</sub> = number of observations  
 N<sub>v</sub> = number of variables
- S6. D. T. Cromer and J. T. Waber: *International Tables for X-ray Crystallography*, Vol. IV, The Kynoch Press, Birmingham, England, Table 2.2A, (1974).
- S7. J. A Ibers and W. C. Hamilton, *Acta Crystallogr.*, 1964, **17**, 781.
- S8. D. C. Creagh and W. J. McAuley: *International Tables for Crystallography*, Vol. C, (A. J. C. Wilson, ed.), Kluwer Academic Publishers, Boston, Table 4.2.6.8, pages 219-222 (1992).
- S9. D. C. Creagh and J. H. Hubbell: *International Tables for Crystallography*, Vol. C, (A. J. C. Wilson, ed.), Kluwer Academic Publishers, Boston, Table 4.2.4.3, pages 200-206 (1992).
- S10. **SHELXTL**. Version 5.1, Bruker AXS Inc., Madison, Wisconsin, USA. (1997).
